# Supplementary material for: Aggregated Pt–Pd nanoparticles on Nafion membrane for impulsive decomposition of hydrogen peroxide
Source: Royal Society of Chemistry journal article supplement (doi:10.1039/c5ra05620a), 2015-01-01
Supplement: c5ra05620a1.pdf [file c5ra05620a1.pdf]

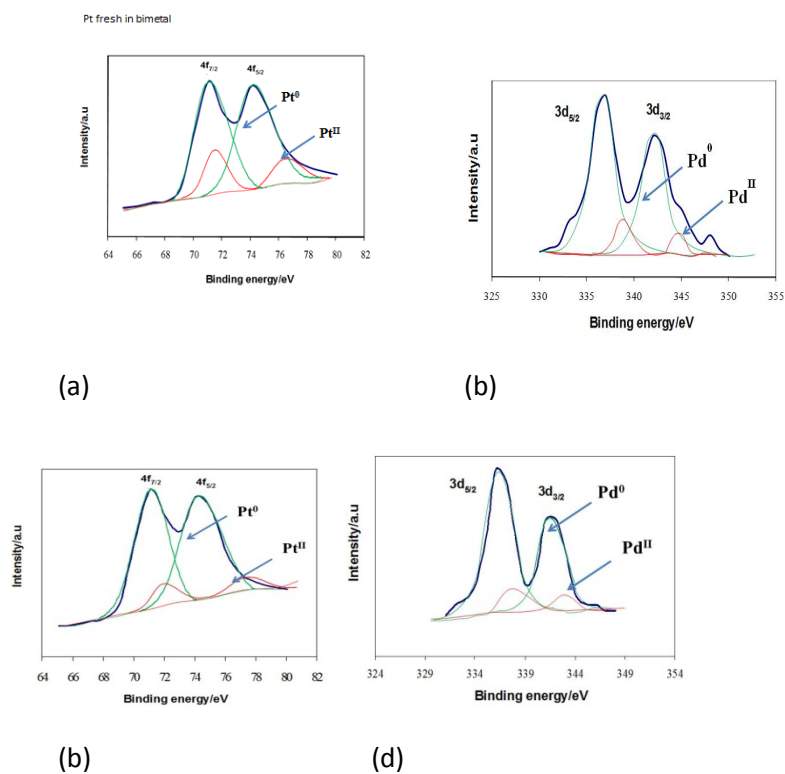

S1: Deconvoluted XPS spectra of Pt(4f) (a: fresh, c: after iodide experiment ) and Pd(3d) (b: fresh, d: after iodide experiment ).

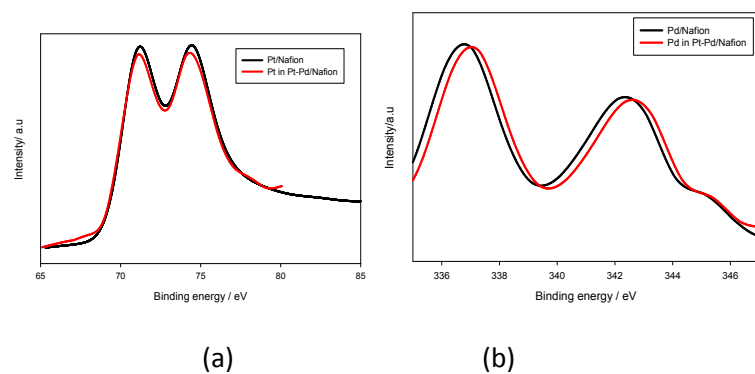

S2: Relative binding energy positions of (a) Pt(4f) and (b) Pd(3d) under monometallic and bimetallic forms
